# Supplementary material
Source: HighWire-hosted journal article supplement (https://gut.bmj.com/content/gutjnl-2023-330856)
Supplement: inline-supplementary-material-2 [file inline-supplementary-material-2.pdf]

**Table S2. Characteristics of patients analyzed by immunohistochemistry**

|                                | <b>IBD</b> | <b>PSC-IBD</b> |
|--------------------------------|------------|----------------|
| n-value                        | 30         | 19             |
| age in years                   | 42 ± 14.5  | 37 ± 14.5      |
| sex male %                     | 60%        | 84%            |
| <b>Disease activity, n (%)</b> |            |                |
| Remission                      | 12 (40%)   | 9 (47%)        |
| Mild                           | 13 (43%)   | 7 (37%)        |
| Moderate                       | 3 (10%)    | 3 (16%)        |
| Severe                         | 2 (7%)     | 0              |
| <b>Medications, n (%)</b>      |            |                |
| 5-ASA                          | 17 (57%)   | 6 (32%)        |
| Thiopurines                    | 2 (7%)     | 7 (37%)        |
| Anti-TNF                       | 14 (47%)   | 5 (26%)        |
| Anti-IL12/23                   | 1 (3%)     | 2 (11%)        |
| UDCA                           | 0          | 16 (84%)       |
| Methotrexate                   | 1 (3%)     | 0              |
